# Supplementary material for: New Insights into Blood Circulating Lymphocytes in Human Pneumocystis Pneumonia
Source: MDPI journal article supplement (doi:10.3390/jof7080652), 2021-08-11
Supplement: s1 [file s1]

## SUPPLEMENTARY DATA

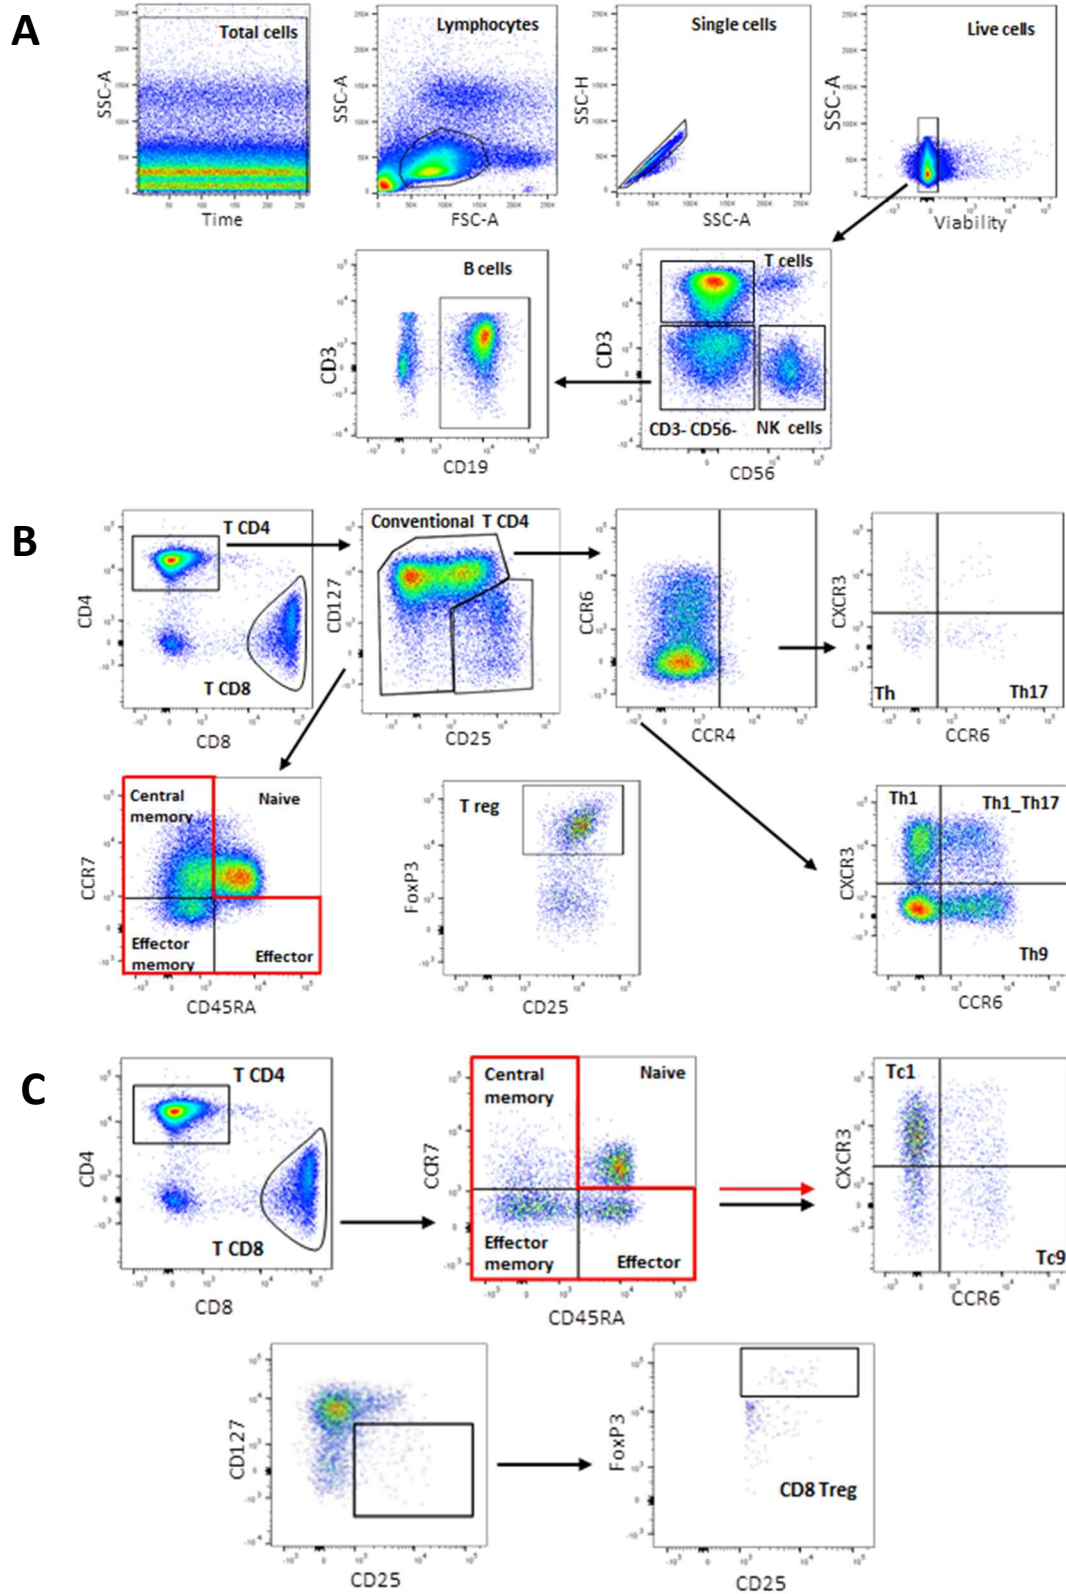

**Supplemental Figure S1: Gating strategy for lymphocyte immunophenotyping.**

A: general lymphocyte immunophenotyping. B: CD4 subpopulation gating from T cells determined in gating strategy A. C: CD8 subpopulation gating from T cells determined in gating strategy A.

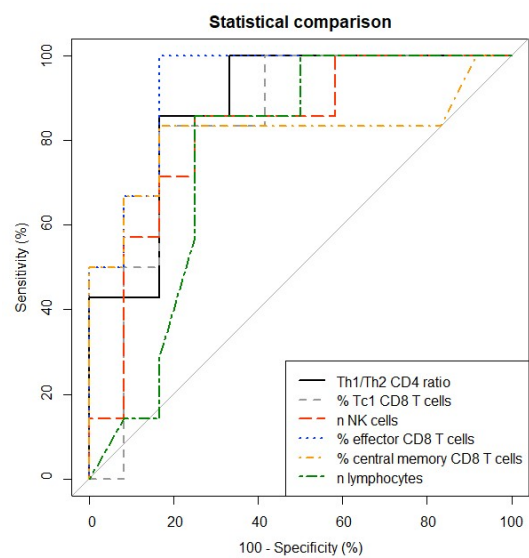

**Supplemental Figure S2: ROC curves for mortality risk**

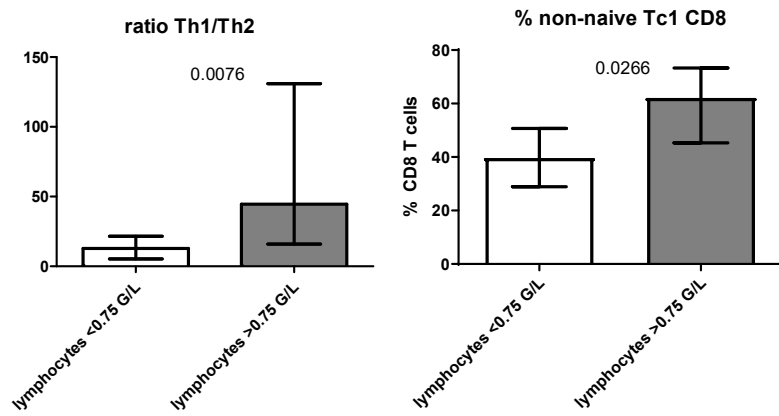

**Supplemental Figure S3: Lymphocyte subpopulations according to total blood lymphocyte count threshold (0.75 G/L).**

Data are expressed as medians [interquartile intervals] and compared by the Mann-Whitney U test. P-values are added on each graph.

|                      |        | Th1/Th2 | % Tc1 CD8 | n NK cells | % effector CD8      | % CM CD8            | n lymphocytes       |
|----------------------|--------|---------|-----------|------------|---------------------|---------------------|---------------------|
|                      | AUC    | 88.1%   | 83.33%    | 82.14%     | 93.06%              | 81.25%              | 76.79%              |
| Th1/Th2              | 88.1%  | -       | p= 0.34   | p=0.65     | p=0.56 <sup>#</sup> | p=0.80              | p=0.36              |
| % Tc1 CD8            | 83.33% |         | -         | p=0.86     | p=0.44 <sup>#</sup> | p=0.90              | p=0.63              |
| n NK cells           | 82.14% |         |           | -          | p=0.32 <sup>#</sup> | p=0.91              | p=0.61              |
| % effector CD8       | 93.06% |         |           |            | -                   | p=0.37 <sup>#</sup> | p=0.19 <sup>#</sup> |
| % central memory CD8 | 81.25% |         |           |            |                     | -                   | p=0.70              |
| n lymphocytes        | 76.79% |         |           |            |                     |                     | -                   |

**Supplemental Table S1: Comparison of the area under the curve (AUC) for the ROC analysis.**

AUC: Area under the curve. #: comparison performed with Bootstrap test. There was no significant difference between the AUCs ( $p > 0.05$ ).
